# Supplementary material
Source: PubMed Central journal article supplement (PMC7833996)
Supplement: mmc1.pdf [file mmc1.pdf]

# THE LANCET Microbe

## Supplementary appendix

This appendix formed part of the original submission. We post it as supplied by the authors.

Supplement to: Brown L-A K, Ellis J, Gorton R, et al. Surveillance for COVID-19-associated pulmonary aspergillosis. *Lancet Microbe* 2020; **1**: e152

**Table 1.** Characteristics of patients identified through active surveillance for COVID-19-associated pulmonary aspergillosis (CAPA).

| Patient number | Age, gender | EORTC/MSGERC host factor                             | Serum biomarkers                           | ETA GM                              | ETA <i>Aspergillus</i> PCR | ETA Culture                             | Antifungal therapy during surveillance period         | Putative CAPA | Outcome                       | Comment                                                                                                                                                |
|----------------|-------------|------------------------------------------------------|--------------------------------------------|-------------------------------------|----------------------------|-----------------------------------------|-------------------------------------------------------|---------------|-------------------------------|--------------------------------------------------------------------------------------------------------------------------------------------------------|
| 1              | 27M         | Yes (Acute myeloid leukaemia)                        | 5 x negative GM<br>4 x negative BDG        | <b>2 x positive</b>                 | 2 x positive               | <b>1 x <i>Aspergillus fumigatus</i></b> | Itraconazole (prophylaxis), Caspofungin, Posaconazole | <b>Yes</b>    | Discharged                    | EORTC/MSGERC host factor present                                                                                                                       |
| 2              | 40M         | Yes (Acute lymphoblastic leukaemia, allogeneic HSCT) | 6 x negative GM<br>5 x negative BDG        | <b>2 x positive</b><br>1 x negative | <b>1 x positive</b>        | No growth                               | Liposomal amphotericin, Caspofungin, Itraconazole     | <b>Yes</b>    | Died 38 days after intubation | EORTC/MSGERC classical host factor present<br>Chest imaging suspicious for IPA                                                                         |
| 3              | 66M         | No                                                   | 1 x negative GM<br><b>3 x positive BDG</b> | 1 x negative                        | N/A                        | No growth                               | None                                                  | No            | Died 34 days after intubation | No clear cause for raised BDG found<br>Died from gastrointestinal haemorrhage and kidney failure                                                       |
| 4              | 66M         | No                                                   | 3 x negative GM<br><b>2 x positive BDG</b> | <b>1 x positive</b><br>2 x negative | Not done                   | No growth                               | Caspofungin, fluconazole                              | No            | Died 58 days after intubation | <i>C. albicans</i> in blood culture                                                                                                                    |
| 5              | 70M         | No                                                   | 4 x negative GM<br>3 x negative BDG        | <b>1 x positive</b><br>2 x negative | <b>1 x positive</b>        | No growth                               | Fluconazole                                           | No            | Died 47 days after intubation | Only 1 positive ETA for GM out of 3 samples, considered clinically non-significant.<br>Treated for oral candidiasis                                    |
| 6              | 66M         | No                                                   | 3 x negative GM<br>2 x negative BDG        | <b>1 x positive</b><br>1 x negative | <b>1 x positive</b>        | No growth                               | Caspofungin                                           | No            | Discharged                    | Clinically improved before institution of antifungals making CAPA unlikely                                                                             |
| 7              | 47M         | No                                                   | 2 x negative GM<br>3 x positive BDG        | 1 x positive                        | 1 x positive               | 1 x <i>Aspergillus fumigatus</i>        | Caspofungin                                           | No            | Discharged                    | Underlying tracheobronchomegaly. Respiratory function improved before institution of antifungals making CAPA unlikely.<br>Treated for oral candidiasis |

Abbreviations: EORTC/MSGERC, European Organization for Research and Treatment of Cancer and the Mycoses Study Group Education and Research Consortium; ETA, endotracheal aspirate; GM, galactomannan; PCR, polymerase chain reaction; BDG, beta-D-glucan; HSCT, haematopoietic stem cell transplantation; IPA, invasive pulmonary aspergillosis
